# Supplementary material for: Astaxanthin alleviates ganglioside metabolism disorder in the cortex of Alzheimer's disease mice
Source: Royal Society of Chemistry journal article supplement (doi:10.1039/d3fo03223j), 2023-01-01
Supplement: d3fo03223j1.pdf [file d3fo03223j1.pdf]

Table S1 Sequences of the primers used in the quantitative RT-qPCR

| Gene             | Primer sequence 5'-3' | Sequences               |
|------------------|-----------------------|-------------------------|
| <i>st3gal5p1</i> | Forward               | TGCTAGGGGACACGGGC       |
|                  | Reverse               | GGGAGGTCCTTGAGCAATCA    |
| <i>b4galnt1</i>  | Forward               | TACCAGGCCAACACAGCAG     |
|                  | Reverse               | CCGTAGGGTAAAAGCGTCGG    |
| <i>b3galt4</i>   | Forward               | GCCCCGCCTCTTGATTTCTAA   |
|                  | Reverse               | GGCCGTACACACCAGGATG     |
| <i>hexa</i>      | Forward               | CCCAGCTTCTCAAATAAACAGCA |
|                  | Reverse               | TCAGAGGCGAGTAAACACTGG   |
| <i>glb1</i>      | Forward               | CGGATACCCCGCTTCTACTG    |
|                  | Reverse               | CACGGTCCCCAGAAAACACTCA  |
| <i>st8sial1</i>  | Forward               | TCCACGTA CTCCCTCTTCCC   |
|                  | Reverse               | AGAATCCCACCGTTTCCCAC    |
| <i>st3gal2</i>   | Forward               | CTTTGCGACAGGGTTTCATT    |
|                  | Reverse               | CAGGGTTTGCTCAACAAGTG    |
| <i>soat</i>      | Forward               | ATCACATCTCGGGAGCAAGC    |
|                  | Reverse               | GAGAAATGCCCGTACCCTGT    |
| <i>siae</i>      | Forward               | AGAGTTGGTCAGCCCGAGAT    |
|                  | Reverse               | GTCTTGTCGGTCCAGTCACA    |
